# Supplementary material for: Exploring online health resources and self-care among irritable bowel syndrome patients: analyzing internet use and AI chatbot interactions
Source: PubMed Central journal article supplement — Mhealth. 2024 Oct 23;10:28. doi: 10.21037/mhealth-24-14 (PMC11557155; doi:10.21037/mhealth-24-14), 2024-10-23
Supplement: mh-10-24-14-dss.pdf [file mh-10-24-14-dss.pdf]

## Data Sharing Statement

|                     |                                                                                                                                                     |                                                                                                                                   |
|---------------------|-----------------------------------------------------------------------------------------------------------------------------------------------------|-----------------------------------------------------------------------------------------------------------------------------------|
| <b>Article Info</b> | <a href="https://dx.doi.org/10.21037/mhealth-24-14">https://dx.doi.org/10.21037/mhealth-24-14</a>                                                   |                                                                                                                                   |
| <b>Item</b>         | <b>Question</b>                                                                                                                                     | <b>Authors' Response<br/>(place "-" if not applicable)</b>                                                                        |
| 1                   | Would you like to share data collected for your study to others?                                                                                    | Yes.                                                                                                                              |
| 2                   | If not, would you like to share the reason for your decision?                                                                                       | -                                                                                                                                 |
| 3                   | What data in particular will be shared?                                                                                                             | The survey raw data which was analyzed.                                                                                           |
| 4                   | Any other documents will be shared? Such as study protocol, statistical analysis plan, informed consent form, clinical study report, analytic code. | No.                                                                                                                               |
| 5                   | When will data availability begin?                                                                                                                  | Upon Publication.                                                                                                                 |
| 6                   | When will data availability end?                                                                                                                    | Always available upon request.                                                                                                    |
| 7                   | To whom will you share the data?                                                                                                                    | Medical Informatics researchers.                                                                                                  |
| 8                   | For what type of analysis or purpose?                                                                                                               | For future studies evaluating the use of Online health related information among patients.                                        |
| 9                   | How or where can the data/documents be obtained?                                                                                                    | Through contact to corresponding author by email <a href="mailto:Ibraheemaltamimi02@gmail.com">Ibraheemaltamimi02@gmail.com</a> . |
| 10                  | Any other restrictions?                                                                                                                             | We may balance the potential benefits and risks for each request and then provide the data that could be shared.                  |
