# Supplementary material for: Exploring online health resources and self-care among irritable bowel syndrome patients: analyzing internet use and AI chatbot interactions
Source: PubMed Central journal article supplement — Mhealth. 2024 Oct 23;10:28. doi: 10.21037/mhealth-24-14 (PMC11557155; doi:10.21037/mhealth-24-14), 2024-10-23
Supplement: mh-10-24-14-supplementary.pdf [file mh-10-24-14-supplementary.pdf]

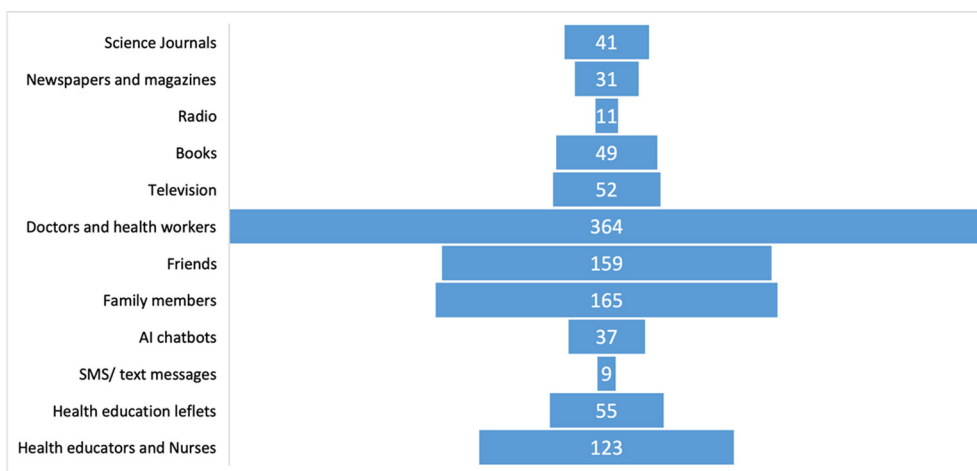

Figure S1 Sources of health information for information by the participants.

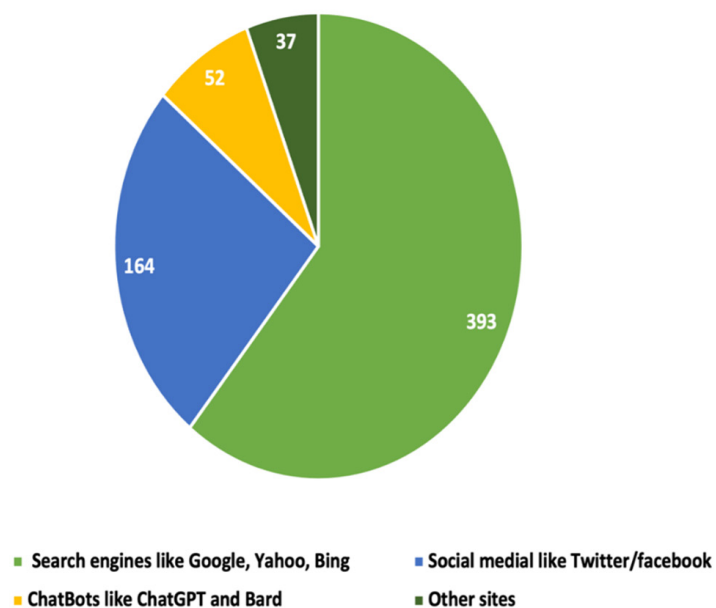

Figure S2 Preferred browsers used by health information seekers.

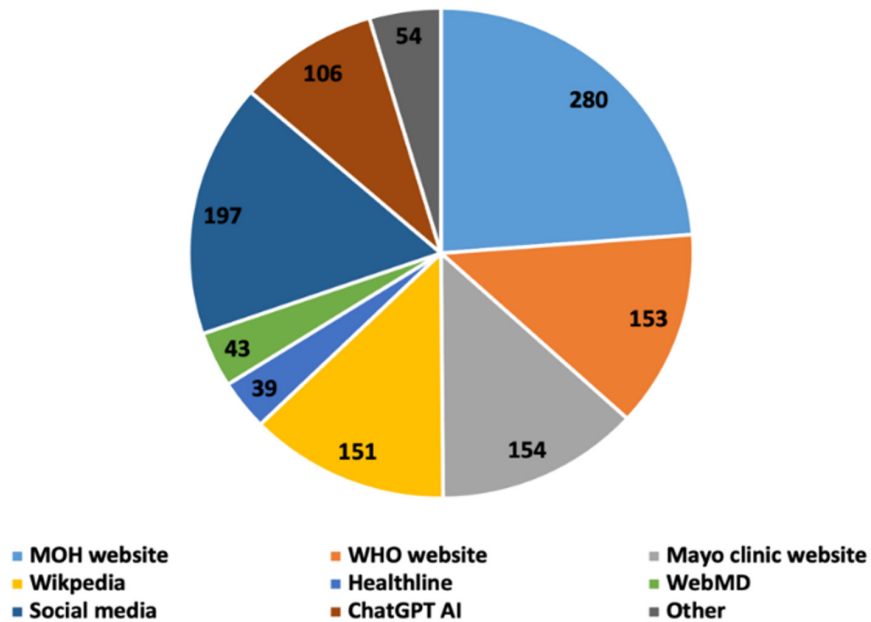

**Figure S3** Ranking of websites for health information seekers.

**Table S1** Multivariable logistic binary regression analysis of participants odds of having irritable bowel syndrome (IBS), N=451

| Variables                                     | Multivariable adjusted odds ratio | 95% CI for odds ratio |       | P value |
|-----------------------------------------------|-----------------------------------|-----------------------|-------|---------|
|                                               |                                   | Lower                 | Upper |         |
| Sex                                           | 1.480                             | 0.999                 | 2.193 | 0.050   |
| Age $\geq$ 45 years                           | 0.811                             | 0.659                 | 0.999 | 0.049   |
| Positive medical History of Migrane headaches | 2.096                             | 1.203                 | 3.651 | 0.009   |
| Educational Level                             | 0.975                             | 0.754                 | 1.260 | 0.85    |
| Marital state                                 | 1.360                             | 0.778                 | 2.375 | 0.28    |
| IBS knowledge score                           | 1.153                             | 1.054                 | 1.262 | 0.002   |
| Constant                                      | 0.851                             |                       |       | 0.75    |

Dependent outcome variable: irritable bowel syndrome (no/yes).
